# Supplementary material for: Individually Tailored, Adaptive Intervention to Manage Gestational Weight Gain: Protocol for a Randomized Controlled Trial in Women With Overweight and Obesity
Source: PubMed Central journal article supplement (PMC6015270; doi:10.2196/resprot.9220), 2018-06-08

## Fast, Easy & Healthy Breakfast Recipes

### Breakfast Sandwich Builder

Makes: 1 serving

All of these breakfast sandwiches can be made ahead and frozen individually for a perfect quick and easy breakfast! Pick your favorite combination and assemble into a sandwich. Individually wrap each sandwich in plastic wrap and transfer them into a gallon sized plastic bag for storage in the freezer. When you're ready to eat your sandwich in the morning, simply take one out of the freezer, unwrap it and microwave until desired temperature (30 seconds-1 minute). Then top with your favorite veggie and extra options!

Here are some examples, but the possibilities are endless!

| BREAD                        | EGG                     | PROTEIN                  | VEGETABLE<br><small>*ADD WHEN READY TO EAT</small> | EXTRAS<br><small>*ADD WHEN READY TO EAT</small> |
|------------------------------|-------------------------|--------------------------|----------------------------------------------------|-------------------------------------------------|
| 1 bagel thin                 | Hard boiled egg, sliced | Ham                      | Slice of tomato                                    | Thin slice of low fat cheese                    |
| 1 whole wheat English muffin | Scrambled               | 2 slices of Turkey Bacon | Mushroom and spinach (scrambled with egg)          | Sprinkle of grated parmesan                     |
| 1 small tortilla             | Egg white               | 1/2 cup black beans      | Slices of avocado                                  | Salsa and/or hot sauce                          |

## MOMS ON THE MOVE

A SAMPLE WORKOUT GUIDE FROM THE HEALTHY MOM ZONE STUDY

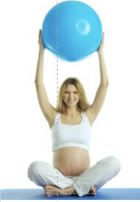

### 2<sup>nd</sup> Trimester

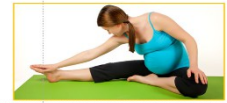

#### Workout Calendar

| Month                     | Week | Monday | Tuesday | Wednesday | Thursday | Friday | Saturday |
|---------------------------|------|--------|---------|-----------|----------|--------|----------|
| 2 <sup>nd</sup> Trimester |      |        |         |           |          |        |          |
| 3 <sup>rd</sup> Trimester |      |        |         |           |          |        |          |
| 4 <sup>th</sup> Trimester |      |        |         |           |          |        |          |

### 2<sup>nd</sup> Trimester - Strength

- Braced Squat (2 Sets, 10-15 Reps)**
  - (a) Hold a weight plate in front of your chest with both hands, your arms completely straight!
  - (b) Lower your body as far as you can.
  - (c) Push your hips back and bend your knees.
  - Pause then slowly push yourself back to starting position.
  - You can modify the squats by placing a fitness ball behind your back and against the wall.

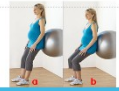

Supplement: resprot_v7i6e150_app1.pdf [file resprot_v7i6e150_app1.pdf]
